# Supplementary material for: Enantioselective synthesis of bicyclic compounds via catalytic 1,4-addition-ring closing metathesis
Source: Royal Society of Chemistry journal article supplement (doi:10.1039/b100283j), 2001-01-01
Supplement: b100283j.doc [file b100283j.doc]

Electronic Supplementary Information

Enantioselective synthesis of bicyclic compounds via catalytic 1,4-addition-ring closing metathesis

# Robert Naasz, Leggy A. Arnold, Adriaan J. Minnaard and Ben L. Feringa*

Typical experimental procedure for the synthesis of (1*S*,4a*R*,8a*R*)-1-ethyl-1,3,4,5,8,8a-hexahydro-4a(*2H*)-naphthalenol **6a**.

Under an Ar atmosphere in flame dried glassware a mixture of 9.4 mg (0.026 mmol) Cu(OTf)2 and 28 mg (0.052 mmol) of (*S,R,R*)-**3** in 50 mL of toluene was stirred at room temperature for 1 h. The solution was cooled to –30C and 0.50 mL (5.2 mmol) of cyclohexenone (**1a**) was added. After the solution was stirred for 10 min Et2Zn (7.1 mL of a 1.1 M solution in toluene) was added. Following the completion of the reaction (after 3 h as checked by GC) 240 mg (0.21 mmol) of Pd(PPh3)4 and 0.59 mL (5.5 mmol) of allyl acetate were added and the reaction mixture was allowed to warm to 0C and stirred overnight. The reaction mixture was quenched with 50 mL of 1 M HCl and the aqueous layer was extracted with ether (3  30 mL). The combined organic layers were washed with brine (50 mL) and dried over Na2SO4. Filtration and evaporation of the solvent was followed by column chromatography (silica, hexanes:ether = 4:1) to yield **2a** (trans/cis: 9:1, e.e. of trans **2a** = 96%) as a colourless oil (763 mg, 4.6 mmol, 88%). 1H-NMR (CDCl3, 300 MHz): 0.78 (t, *J* = 7.3 Hz, 3H), 1.1-2.4 (m, 12H), 4.88 (m, 2H), 5.67 (m, 1H). *Trans*-**2a**: 13C-NMR (CDCl3, 300 MHz): 10.41 (q), 24.90 (t), 25.72 (t), 28.36 (t), 31.40 (t), 41.18 (t), 43.18 (d), 54.61 (d), 115.91 (t), 136.45 (d), 212.92 (s).

Under an Ar atmosphere in flame dried glassware 400 mg (2.41 mmol) of **2a** was dissolved in 10 mL of dry THF. The solution was cooled to 0C after which allylmagnesium chloride (1.8 mL of a 2 M solution in THF) was added dropwise and the solution was stirred overnight. The reaction mixture was quenched with 15 mL of 1 M HCl and the aqueous layer was extracted with ether (3  20 mL). The combined organic layers were washed with brine (30 mL) and dried over Na2SO4. Filtration and evaporation of the solvent was followed by filtration through a short column (silica, hexanes:ether = 5:1) giving >95% pure **4a** as a mixture of isomers as a slightly yellow oil (463 mg, 2.23 mmol, 92%). 1H-NMR (CDCl3, 300 MHz): 0.80 (t, 3H), 1.0-1.8 (m, 11H), 2.1-2.4 (m, 4H), 4.8-5.1 (m, 4H), 5.7-6.0 (m, 2H). (1R, 2R, 3S)-**4a**:13C-NMR (CDCl3, 300 MHz): 10.53 (q), 20.94 (t), 25.73 (t), 30.92 (t), 31.43 (t), 37.42 (t), 37.38 (d), 46.44 (t), 46.78 (d), 74.75 (s), 115.64 (t), 118.06 (t), 134.11 (d), 139.13 (d).

Under an Ar atmosphere in flame dried glassware 62 mg (0.10 mmol) of **5** was dissolved in 30 mL of dry benzene. **4a** (310 mg, 1.49 mmol) Was added dropwise and the mixture was stirred overnight. After oxidation of the catalyst by exposing the reaction mixture to air for 24 h and evaporation of the solvent, pure (1*S*, 4a*R*, 8a*R*)-**6a** (161 mg, 0.89 mmol, 60%, e.e. = 96%) was obtained by column chromatography (silica, hexanes:ether = 6:1). 1H-NMR (CDCl3, 300 MHz): 0.78 (t, 3H), 0.8-2.3 (m, 15H), 5.54 (m, 1H), 5.68 (m, 1H). 13C-NMR (CDCl3, 300 MHz): 10.23 (q), 21.23 (t), 24.97 (t), 26.54 (t), 30.78 (t), 38.86 (d), 38.97 (t), 40.86 (t), 42.79 (d), 68.96 (s), 123.74 (d), 127.04 (d). The e.e. of (1*S*, 4a*R*, 8a*R*)-**6a** was determined by GC on a Chiraldex G-TA column, 50 m x 0.25 mm, He-flow 1.0 mL/min, isothermic 125˚C. *T* ret 53.1 min: (1*S*, 4a*R*, 8a*R*)-**6a**, *T*ret 54.4 min: (1*R*, 4a*S*, 8a*S*)-**6a**.

The configuration of the major isomer of **6a** was deduced from the HSQC, COSY and NOESY NMR spectral data of the *p*-nitrobenzoate ester of **6a**:

All protons could be asigned by COSY and HSQC experiments (*vide infra*). The methyl protons (δ = 0.90 ppm, t, 3H) could unambigously be assigned by their characteristic chemical shift and splitting pattern. A COSY interaction identified the two diastereotopic H7 neighbour protons at 1.21 and around 1.6 ppm (partial overlap with other proton). Both H7 protons have a COSY interaction with one other proton: H6 at 1.55 ppm. H5 can then be identified by HSQC as the proton connected to the other non-vinylic doublet C which is confirmed by an interaction between this proton (H5 at 1.46 ppm) and H6.

Starting from H6 additional interactions with two other protons are observed. Both protons are attached to the same carbon (HSQC) and are therefore assigned as the two H8’s at 1.10 and 1.81 ppm. Both these protons give a COSY interaction with two protons at around 1.35 and 1.6 ppm (both overlap with other signals) which are thus identified as the H9 protons. The signal at 1.6 ppm couples with a proton at 3.05 ppm (H10). HSQC identifies the other H10 at around 1.35 ppm.

Starting from H5 additional COSY interactions with two protons are observed (both H4’s at 2.07 and 2.38 ppm). Both of these couple with a proton at 5.72 ppm (H3). This proton couples with its neighbour H2 at 5.50 ppm which in turn couples with one of the H1 protons (3.32 ppm). Through HSQC the other H1 proton is found at 2.09 ppm.

If the two six membered rings are trans fused as is expected from addition of the Grignard reagent trans to the allylic group, NOE interactions should be observed between H1b and H10b, H1b and H5, H5 and H10b, H5 and H8b and H8b and H10b. Indeed a NOE interaction is observed between H5 and one of the H1’s which is therefore H1b at 2.09 ppm. Also NOE interactions between H5 and H8b (1.10 ppm), H5 and H10b (1.35 ppm) and H1b and H10b are observed. Especially the presence of both a H5-H1b and a H1b-H10b NOE interaction excludes a cis fused bicycle in a steroid or non-steroid conformation. Since the addition of the ethyl group to 2-cyclohexenone in the presence of (*S*,*R*,*R*)-**3** gives the *S* configuration at carbon 1 (reference 8c in main text) the major isomer of **6a** is identified as (1*S*,4a*R*,8a*R*)-1-ethyl-1,3,4,5,8,8a-hexahydro-4a(2H)-naphthalenol as depicted in the figure (*vide supra*).

500 MHz 1H-NMR of *p*-nitrobenzoate ester of **6a** in CDCl3:

COSY of *p*-nitrobenzoate ester of **6a** in CDCl3:

HSQC of *p*-nitrobenzoate ester of **6a** in CDCl3:

NOESY of *p*-nitrobenzoate ester of **6a** in CDCl3:

Data for **6a-h**:

(4a*R*, 9*S*, 9a*R*)-9-ethyl-1,4,5,6,7,8,9a-octahydro-4a*H*-benzo[a]cyclohepten-4a-ol (**6b**)*:

1H-NMR (CDCl3, 300 MHz): 0.79 (t, 3H), 1.16 (m, 2H), 1.37 (m, 5H), 1.6-2.0 (m, 8H), 2.0-2.3 (m, 2H), 5.53 (m, 1H), 5.68 (m, 1H).

13C-NMR (CDCl3, 300 MHz): 10.56 (q), 20.71 (t), 25.92 (t), 27.15 (t), 27.91 (t), 33.12 (t), 38.24 (d), 39.87 (t), 42.69 (t), 46.47 (d), 72.38 (s), 124.41 (d), 127.68 (d).

E.e. determination of **6b** was performed on a Chiraldex G-TA column, 50 m  0.25 mm, He flow: 1.0 mL/min, 135 °C isothermic: *T*ret 53.0 min: (4a*R*, 9*S*, 9a*R*)-**6b**, *T*ret 54.3 min: (4a*S*, 9*R*, 9a*R*)-**6b**. + 25.0 (*c* 0.8, CHCl3).

(4a*R*, 10*S*, 10a*R*)-10-ethyl-1,5,6,7,8,9,10,10a-octahydrobenzo[a]cycloocten-4a(4*H*)-ol (**6c**) *:

1H-NMR (CDCl3, 300 MHz): 0.85 (t, 3H), 1.0-1.4 (m, 4H), 1.4-1.8 (m, 11H), 1.9-1.2 (m, 3H), 2.4 (m, 1H), 5.54 (m, 1H), 5.70 (m, 1H).

13C-NMR (CDCl3, 300 MHz): 12.92 (q), 24.98 (t), 25.13 (t), 25.71 (t), 26.48 (t), 27.76 (t), 33.06 (t), 35.95 (d), 39.27 (d), 39.55 (t), 40.01 (t), 73.77 (s), 124.07 (d), 127.39 (d).

E.e. determination of **6c** was performed on a Chiraldex G-TA column, 50 m  0.25 mm, He flow: 1.0 mL/min, 140 °C isothermic: *T*ret 77.8 min: (4a*R*, 10*S*, 10a*R*)-**6c**, *T*ret 79.6 min: (4a*S*, 10*R*, 10a*R*)-**6c**.

(1*R*, 4a*R*, 8a*R*)-1-ethyl-2,2-dimethyl-1,3,4,5,8,8a-hexahydro-4a(2*H*)-naphthalenol (**6d**) *:

1H-NMR (CDCl3, 300 MHz): 0.74 (s, 3H), 0.88 (s + t, 6H), 0.9-1.2 (m, 3H), 1.3-1.7 (m, 6H), 1.79 (m, 1H), 1.9-2.3 (m, 3H), 5.54 (m, 1H), 5.71 (m, 1H).

13C-NMR (CDCl3, 300 MHz): 16.12 (q), 19.45 (q), 21.59 (t), 30.39 (q), 34.34 (s), 34.60 (t), 36.64 (t), 41.06 (t), 41.11 (d), 48.32 (d), 69.14 (s), 123.72 (d), 127.35 (d).

E.e. determination of **6d** was performed on a Chiraldex G-TA column, 50 m  0.25 mm, He flow: 1.0 mL/min, 125 °C isothermic: *T*ret 76.1 min: (1*S*, 4a*R*, 8a*R*)-**6f**, *T*ret 78.4 min: (1*R*, 4a*S*, 8a*S*)-**6d**. + 43.3 (*c* 0.6, CHCl3).

(1*S*, 4a*R*, 8a*R*)-1-methyl-1,3,4,5,8,8a-hexahydro-4a(2*H*)-naphthalenol (**6e**) *:

1H-NMR (CDCl3, 300 MHz): 0.80 (d, 3H), 0.97 (m, 1H), 1.1-1.3 (m, 3H), 1.3-1.5 (m, 2H), 1.5-1.8 (m, 4H), 1.9-2.1 (m, 2H), 2.2 (m, 1H), 5.55 (m, 1H), 5.68 (m, 1H).

13C-NMR (CDCl3, 300 MHz): 19.56 (q), 21.31 (t), 26.75 (t), 33.14 (d), 35.42 (t), 38.92 (t), 40.75 (t), 45.51 (d), 68.81 (s), 123.84 (d), 127.04 (d).

E.e. determination was performed with on the *p*-nitrobenzoate ester of **6e** by chiral HPLC: Chiralcel OD, heptane/2-propanol: 99/1, 1.0 mL/min, λdet: 254 nm. *T*ret 6.7 min and *T*ret 7.9 min.

(1*S*, 4a*R*, 8a*R*)-1-butyl-1,3,4,5,8,8a-hexahydro-4a(2*H*)-naphthalenol (**6f**) *:

1H-NMR (CDCl3, 300 MHz): 0.83 (t, 3H), 0.9-1.8 (m, 14H), 1.9-2.1 (m, 2H), 2.21 (m, 1H), 5.54 (m, 1H), 5.68 (m, 1H).

13C-NMR (CDCl3, 300 MHz): 14.10 (q), 21.82 (t), 23.13 (t), 26.62 (t), 28.23 (t), 31.50 (t), 32.34 (t), 37.64 (d)), 38.96 (t), 40.90 (t), 43.32 (d), 68.98 (s), 123.73 (d), 127.08 (d).

E.e. determination of **6f** was performed on a Chiraldex G-TA column, 50 m  0.25 mm, He flow: 1.0 mL/min, 135 °C isothermic: *T*ret 67.0 min: (1*S*, 4a*R*, 8a*R*)-**6f**, *T*ret 68.5 min: (1*R*, 4a*S*, 8a*S*)-**6f**. + 78.6 (*c* 0.9, CHCl3).

(1*S*, 4a*R*, 9a*R*)-1-ethyl-1,2,3,4,5,6,9,9a-octahydro-4a*H*-benzo[*a*]cyclohepten-4a-ol (**6h**) *:

1H-NMR (CDCl3, 300 MHz): 0.77 (t, 3H), 0.95 (m, 2H), 1.1-1.7 (m, 10H), 1.8-2.4 (m, 5H), 5.7 (m, 2H).

13C-NMR (CDCl3, 300 MHz): 10.11 (q), 21.40 (t), 22.92 (t), 24.59 (t), 26.08 (t), 31.35 (t), 37.07 (d), 40.61 (t), 42.25 (t), 48.14 (d), 74.00 (s), 132.07 (d), 132.23 (d).

E.e. determination of **6h** was performed on a Chiraldex G-TA column, 50 m  0.25 mm, He flow: 1.0 mL/min, 135 °C isothermic: *T*ret 51.9 min: (1*S*, 4a*R*, 9a*R*)-**6h**, *T*ret 53.6 min: (1*R*, 4a*S*, 9a*S*)-**6h**. + 41.8 (*c* 0.7, CHCl3).

* The absolute configuration was assigned on the basis of analogy with the nitrobenzoate ester of **6a**.
